# Supplementary material
Source: publisher figshare collection journal article supplement (https://gsajournals.figshare.com/ndownloader/files/13878980)
Supplement: Supplementary file 1 [file 13878980]

Table S5 Predicted genes involved in transporter system of *M. dispar* GS01

| Locus | Product | Gene | Protein length (aa) | Position |
| --- | --- | --- | --- | --- |
| ABC transporters | | | | |
| M.dispar-GS01_GM000049 | ABC transporter ATP-binding - Pr1 | - | 295 | 50446…51333 |
| M.dispar-GS01_GM000102 | ABC transporter xylose-binding lipoprotein | - | 455 | 135115…136482 |
| M.dispar-GS01_GM000103 | sugar ABC transporter ATP-binding protein | - | 508 | 136598…138124 |
| M.dispar-GS01_GM000105 | sugar ABC transporter permease protein | - | 303 | 139829…140740 |
| M.dispar-GS01_GM000122 | putative ABC transporter ATP-binding and permease protein | - | 679 | 159646…161685 |
| M.dispar-GS01_GM000177 | mannitol-1-phosphate 5-dehydrogenase | *mtlD* | 362 | 219155…220243 |
| M.dispar-GS01_GM000251 | Uncharacterized ABC transporter ATP-binding protein YkpA | *ykpA* | 538 | 298589…300205 |
| M.dispar-GS01_GM000253 | oligopeptide ABC transporter system permease | - | 366 | 301871…302971 |
| M.dispar-GS01_GM000255 | oligopeptide ABC transporter ATP-binding protein OppD | *oppD* | 469 | 303938…305347 |
| M.dispar-GS01_GM000256 | oligopeptide transport ATP-binding protein AmiF | *amiF* | 443 | 305337…306668 |
| M.dispar-GS01_GM000300 | ABC transporter ATP binding protein | - | 795 | 377277…379664 |
| M.dispar-GS01_GM000355 | ABC transporter ATP-binding protein | - | 296 | 442288…443178 |
| M.dispar-GS01_GM000366 | ABC transporter permease protein | - | 279 | 456808…457647 |
| M.dispar-GS01_GM000367 | ABC transporter permease protein | - | 308 | 457631…458557 |
| M.dispar-GS01_GM000368 | ABC transport ATP-binding protein | - | 386 | 458547…459707 |
| M.dispar-GS01_GM000381 | oligopeptide ABC transporter ATP-binding protein | - | 779 | 470679…473018 |
| M.dispar-GS01_GM000382 | oligopeptide ABC transporter ATP binding protein OppD | *oppD* | 349 | 473018…474067 |
| M.dispar-GS01_GM000384 | oligopeptide ABC transporter, permease protein | - | 348 | 475211…476257 |
| M.dispar-GS01_GM000387 | ABC transporter ATP-binding protein | - | 767 | 480135…482438 |
| M.dispar-GS01_GM000462 | putative ABC transporter atp-binding protein | - | 238 | 595148…595864 |
| M.dispar-GS01_GM000522 | ABC transporter ATP-binding protein | - | 650 | 662695…664647 |
| M.dispar-GS01_GM000523 | ABC transporter ATP-binding protein | - | 772 | 664738…667056 |
| M.dispar-GS01_GM000607 | ABC transporter ATP-binding protein | - | 784 | 789001…791355 |
| M.dispar-GS01_GM000614 | maltose/maltodextrin ABC transporter ATP-binding protein MsmK | *msmK* | 399 | 795022…796221 |
| M.dispar-GS01_GM000615 | maltose/maltodextrin transport system permease protein | *malG* | 311 | 796224…797159 |
| M.dispar-GS01_GM000616 | maltose/maltodextrin ABC transporter permease | *malF* | 1017 | 797165…800218 |
| M.dispar-GS01_GM000643 | phosphonate transport system substrate-binding protein | *phnD* | 429 | 837191…838480 |
| M.dispar-GS01_GM000644 | phosphonate transport system ATP-binding protein | *phnC* | 256 | 838464…839234 |
| M.dispar-GS01_GM000645 | phosphonate transport system permease protein | *phnE* | 565 | 839227…840924 |
| M.dispar-GS01_GM000656 | ABC transporter permease protein | - | 725 | 853106…855283 |
| M.dispar-GS01_GM000657 | ABC transport permease protein | - | 336 | 855283…856293 |
| M.dispar-GS01_GM000658 | ABC transporter permease | - | 321 | 856256…857221 |
| M.dispar-GS01_GM000690 | spermidine/putrescine ABC transporter ATP-binding protein PotA | *potA* | 444 | 903225…904559 |
| M.dispar-GS01_GM000691 | Spermidine/putrescine ABC transporter permease protein PotB | *potB* | 286 | 904546…905406 |
| M.dispar-GS01_GM000692 | spermidine/putrescine ABC transporter permease protein PotC | *potC* | 274 | 905399…906223 |
| M.dispar-GS01_GM000711 | cobalt/nickel ABC transporter permease protein | *cbiQ* | 325 | 931260…932237 |
| M.dispar-GS01_GM000712 | cobalt/nickel ABC transporter ATP-binding protein | *cbiO* | 300 | 932212…933114 |
| M.dispar-GS01_GM000713 | cobalt/nickel ABC transporter ATP-binding protein | *cbiO* | 272 | 933087…933905 |
| M.dispar-GS01_GM000754 | ABC transporter ATP-binding protein | - | 758 | 978450…980726 |
| M.dispar-GS01_GM000757 | ABC transporter ATP-binding protein | - | 757 | 983404…985677 |
| M.dispar-GS01_GM000797 | putative ABC transporter ATP-binding protein P115 | - | 979 | 1024679…1027618 |
| M.dispar-GS01_GM000104 | simple sugar transport system permease protein | - | 570 | 138117…139829 |
| M.dispar-GS01_GM000254 | ABC-type oligopeptide transport system permease protein | - | 321 | 302971…303936 |
| M.dispar-GS01_GM000258 | peptide/nickel transport system substrate-binding protein | - | 892 | 312739…315417 |
| M.dispar-GS01_GM000383 | oligopeptide transport system permease protein | - | 385 | 474067…475224 |
| M.dispar-GS01_GM000693 | spermidine/putrescine ABC transport system substrate-binding protein | *potD* | 571 | 906208…907923 |
| PTS transporter system | | | | |
| M.dispar-GS01_GM000032 | PTS system, lichenan-specific IIA component | *LicA* | 240 | 37416…38138 |
| M.dispar-GS01_GM000108 | PTS system, glucose-specific IIA component | *crr* | 823 | 142143…144614 |
| M.dispar-GS01_GM000162 | PTS system, ascorbate-specific IIA component | *ulaC, sgaA* | 151 | 205417…205872 |
| M.dispar-GS01_GM000163 | PTS system, ascorbate-specific IIB component | *ulaB, sgaB* | 91 | 205862…206137 |
| M.dispar-GS01_GM000165 | PTS system, ascorbate-specific IIC component | *ulaA, sgaT* | 241 | 206463…207188 |
| M.dispar-GS01_GM000176 | PTS system, mannitol-specific IIB component | *mtlA* | 489 | 217686…219155 |
| M.dispar-GS01_GM000178 | PTS system, mannitol-specific IIA component | *mtlA* | 142 | 220247…220675 |
| M.dispar-GS01_GM000372 | PTS system, ascorbate-specific IIC component | *ulaA, sgaT* | 604 | 463083…464897 |
| M.dispar-GS01_GM000373 | PTS system, ascorbate-specific IIB component | *ulaB, sgaB* | 96 | 465085…465375 |
| M.dispar-GS01_GM000374 | PTS system, ascorbate-specific IIA component | *ulaC, sgaA* | 159 | 465397…465876 |
| M.dispar-GS01_GM000545 | PTS system, fructose-specific IIA component | *fruB* | 663 | 698160…700151 |
| M.dispar-GS01_GM000601 | PTS system, N-acetylglucosamine-specific IIB component | *nagE* | 378 | 783251…784387 |
| M.dispar-GS01_GM000635 | PTS system glucose-specific enzyme IIB component | - | 118 | 827486…827842 |
| M.dispar-GS01_GM000107 | phosphocarrier protein HPr | *ptsH* | 89 | 141629…141898 |
| M.dispar-GS01_GM000459 | phosphoenolpyruvate-protein phosphotransferase | *ptsI* | 578 | 590454…592190 |
| other transporters | | | | |
| M.dispar-GS01_GM000687 | potassium transporter KtrB | *ktrB* | 515 | 900002…901549 |
| M.dispar-GS01_GM000688 | potassium transporter TrkA | *trkA* | 244 | 901815…902549 |
| M.dispar-GS01_GM000177 | mannitol-1-phosphate 5-dehydrogenase | *mtlD* | 362 | 219155…220243 |
| M.dispar-GS01_GM000678 | pyruvate dehydrogenase E1 component subunit alpha | *pdhA* | 374 | 888683…889807 |
| M.dispar-GS01_GM000188 | pyruvate kinase | *pyk* | 411 | 226066…227301 |
| M.dispar-GS01_GM000294 | hypothetical protein | - | 621 | 370543…372408 |
| M.dispar-GS01_GM000498 | dihydrolipoamide dehydrogenase (pyruvate dehydrogenase complex E3 subunit) | *pdhD* | 617 | 636020…637873 |
| M.dispar-GS01_GM000519 | alcohol dehydrogenase | *adh* | 348 | 659678…660724 |
| M.dispar-GS01_GM000639 | glycerol-3-phosphate dehydrogenase | *glpD* | 386 | 831109…832269 |
| M.dispar-GS01_GM000641 | glycerol uptake facilitator protein | *glpF* | 248 | 834542…835288 |
| M.dispar-GS01_GM000551 | magnesium transporter | *mgtE* | 488 | 706701…708167 |
| M.dispar-GS01_GM000211 | chromate transport protein | *chrA* | 180 | 253551…254093 |
| M.dispar-GS01_GM000064 | excinuclease ABC subunit C | *uvrC* | 517 | 73125…74678 |
| M.dispar-GS01_GM000737 | excinuclease ABC subunit A | *uvrA* | 947 | 956243…959086 |
| M.dispar-GS01_GM000777 | excinuclease ABC subunit B | *uvrB* | 667 | 1001849…1003852 |
